1     **Group IIA secreted phospholipase A<sub>2</sub> in human serum kills commensal but not**  
2                                    **clinical *Enterococcus faecium* isolates**

3

4     **Short title: Normal human serum kills commensal *Enterococcus faecium* isolates.**

5

6     Fernanda L. Paganelli<sup>1\*</sup>, Helen L. Leavis<sup>2</sup>, Samantha He<sup>1</sup>, Nina M. van Sorge<sup>1</sup>,  
7     Christine Payré<sup>3</sup>, Gérard Lambeau<sup>3</sup>, Rob J.L. Willems<sup>1</sup>, Suzan H.M. Rooijakkers<sup>1</sup>.

8

9     1. Department of Medical Microbiology, University Medical Center Utrecht, Utrecht  
10        University, The Netherlands.

11    2. Department of Rheumatology and Clinical Immunology, University Medical  
12        Center Utrecht, Utrecht University, The Netherlands.

13    3. Université Côte d'Azur, CNRS, Institut de Pharmacologie Moléculaire et  
14        Cellulaire, Valbonne, France.

15

16    \* corresponding author

17    E-mail: [f.paganelli@umcutrecht.nl](mailto:f.paganelli@umcutrecht.nl)

18

19

20

21

22

23

24

25

## 26 **Abstract**

27 Human innate immunity employs cellular and humoral mechanisms to facilitate rapid  
28 killing of invading bacteria. The direct killing of bacteria by human serum is mainly  
29 attributed to the activity of the complement system that forms pores in Gram-negative  
30 bacteria. Although Gram-positive bacteria are considered resistant to serum killing,  
31 we here uncover that normal human serum effectively kills *Enterococcus faecium*.  
32 Comparison of a well-characterized collection of commensal and clinical *E. faecium*  
33 isolates revealed that human serum specifically kills commensal *E. faecium* strains  
34 isolated from normal gut microbiota, but not clinical isolates. Inhibitor studies show  
35 that the human group IIA secreted phospholipase A2 (hGIIA), but not complement, is  
36 responsible for killing of commensal *E. faecium* strains in human normal serum. This  
37 is remarkable since hGIIA concentrations in ‘non-inflamed’ serum were considered  
38 too low to be bactericidal against Gram-positive bacteria. Mechanistic studies showed  
39 that serum hGIIA specifically causes permeabilization of commensal *E. faecium*  
40 membranes. Altogether, we find that a normal serum concentration of hGIIA  
41 effectively kills commensal *E. faecium* and that hGIIA resistance of clinical *E.*  
42 *faecium* could have contributed to the ability of these strains to become opportunistic  
43 pathogens in hospitalized patients.

44

## 45 **Importance**

46 Human normal serum contains antimicrobial components that effectively kill invading  
47 Gram-negative bacteria. Although Gram-positive bacteria are generally considered  
48 resistant to serum killing, here we show that normal human effectively kills the Gram-  
49 positive *Enterococcus faecium* strains that live as commensals in the gut of humans.  
50 In contrast, clinical *E. faecium* strains that are responsible for opportunistic infections

51 in debilitated patients are resistant against human serum. The key factor in serum  
52 responsible for killing is group IIA secreted phospholipase A2 (hGIIA) that  
53 effectively destabilizes commensal *E. faecium* membranes. We believe that hGIIA  
54 resistance by clinical *E. faecium* could have contributed to the ability of these strains  
55 to cause opportunistic infections in hospitalized patients. Altogether, understanding  
56 mechanisms of immune defense and bacterial resistance could aid in further  
57 development of novel anti-infective strategies against medically important multidrug  
58 resistant Gram-positive pathogens.

59

## 60 **Introduction**

61 The human immune system is essential to protect us against invading bacterial  
62 infections. The first line of immune defense is comprised of cellular and humoral  
63 factors that together fight infections in the first minutes to hours of an infection  
64 against bacteria. Phagocytic cells, such as neutrophils are able to engulf invading  
65 bacteria by bacterial recognition, which is enhanced by bacterial labeling with serum  
66 factors as antibodies and complement activation products (1). However, human serum  
67 also harbors various antimicrobial proteins and peptides that can directly lyse bacteria  
68 without the help of immune cells (2). This serum bactericidal activity is mainly  
69 effective against Gram-negative bacteria that are sensitive for the pore-forming  
70 Membrane Attack Complex (MAC) of the human complement system (3). For long it  
71 has been known that Gram-positive bacteria are resistant to this 'serum bactericidal  
72 activity'. It is generally assumed that all Gram-positive bacteria (both pathogenic and  
73 non-pathogenic) protect themselves against complement-induced pore formation via a  
74 thick layer of peptidoglycan that surrounds the bacterial membrane (4). We here  
75 found that normal human serum selectively kills commensal *E. faecium* strains,

76 whereas disease-associated *E. faecium* strains remain viable.  
77 *Enterococcus faecium* is a common inhabitant of the gut of mammals, birds and  
78 insects (5, 6). While *E. faecium* colonization is harmless in healthy individuals, this  
79 bacterium can cause serious infections in immunocompromised patients, such as  
80 bacteremia and endocarditis (7). In fact, multidrug resistant *E. faecium*, most notably  
81 vancomycin-resistant *E. faecium* (VRE), has emerged as an important cause of  
82 nosocomial infections worldwide (8). Recent work showed that clinical *E. faecium*  
83 isolates are genetically distinct from commensal strains (9). Whole genome  
84 comparison and functional assays identified various virulence factors and  
85 carbohydrate metabolism gene clusters that were enriched in clinical isolates and that  
86 could contribute to successful niche adaptation in hospitals (9-12). Hospitalized  
87 patients suffering from clinical *E. faecium* infections, frequently have a severely  
88 compromised cellular immunity. Yet, innate humoral immunity could still aid in *E.*  
89 *faecium* infection control (13). To what extent this is relevant in this infection type  
90 (by clinical *E. faecium* strains), is currently not completely understood (14-19).  
91 Screening of a collection of commensal and multidrug resistant clinical *E. faecium*  
92 strains revealed that normal human serum specifically kills commensal strains. We  
93 found that the group IIA secreted phospholipase A2 (hGIIA) is key to the bactericidal  
94 activity of serum and that resistance to serum hGIIA could have contributed to the  
95 development of clinical *E. faecium* isolates.

96

## 97 **Results**

### 98 **Human serum kills commensal but not clinical *Enterococcus faecium* strains.**

99 While human serum effectively kills Gram-negative bacteria (20), it is generally  
100 accepted that serum does not kill pathogenic and non-pathogenic Gram-positives (21).

101 Serendipitously however, we discovered that a commensal strain of *E. faecium*  
102 (E1007, isolated from feces of a healthy individual) was effectively killed by human  
103 serum. We incubated  $10^5$  exponential phase *E. faecium* E1007 with normal human  
104 serum (pooled from 20 healthy volunteers) and quantified bacterial survival via  
105 colony enumeration on agar plates (Fig 1A). Within 30 minutes, 10% human serum  
106 could completely kill  $10^5$  E1007 bacteria. In contrast, a clinical *E. faecium* strain  
107 (E1162, isolated from blood of a hospitalized patient) was fully resistant to serum  
108 killing in a similar assay. Based on these results, we extended these analyses to a  
109 broader panel of genomically well-characterized clinical and commensal *E. faecium*  
110 isolates. We selected clinical *E. faecium* strains isolated from hospitalized patients  
111 and compared their serum susceptibility to a selection of commensal *E. faecium*  
112 isolated from healthy individuals or animals. Exposure of all 19 strains (described in  
113 Table 1) to 25% human serum revealed that human serum specifically kills  
114 commensal strains by 70% reduction on average, but not clinical *E. faecium* strains,  
115 which survive for 98% (Fig 1B).

116

117 **Complement does not contribute to serum-mediated killing of commensal *E.***  
118 ***faecium*.**

119 To investigate how human serum kills commensal *E. faecium* strains, we first used  
120 several approaches to inactivate the complement system. Bactericidal activity of the  
121 complement system is mediated by the Membrane Attack Complex (MAC), a ring-  
122 structured pores consisting of proteins C5b, C6, C7, C8 and multiple copies of C9  
123 (C5b-9). Formation of pores in bacterial membranes occurs rapidly following an  
124 enzymatic chain reaction on the cell surface. Initial experiments seemed to suggest  
125 that complement indeed played a role in killing of *E. faecium*. For instance, we found

126 that *E. faecium* killing could be blocked by exposing the serum to 56°C (heat-  
127 inactivated (HI) serum), a method commonly used to inactivate certain heat-labile  
128 complement components (22) (Fig 2A-B). Furthermore, addition of the chelating  
129 agent (Ethylenediaminetetraacetic acid - EDTA), known to block the complement  
130 reaction (23), also interfered with serum killing (Fig 2A, B). However, when we used  
131 more specific inhibitors to block the complement reaction, we found that these  
132 inhibitors did not affect serum-mediated killing of *E. faecium* (Fig 2A). For instance,  
133 application of C3 inhibitor CP40 (24) and C5 inhibitor OmCI (25) did not block  
134 bactericidal activity (Fig 2A), although both inhibitors effectively blocked MAC  
135 deposition on the bacterial surface (Fig 2B). Resistance of the clinical *E. faecium*  
136 strain E1162 was not affected by any of the serum treatments (S1 Fig). From these  
137 data, we concluded that killing of commensal *E. faecium* in human serum is not  
138 mediated by complement, but by another heat-sensitive and divalent cation-dependent  
139 factor (26).

140

#### 141 **hGIIA is essential for serum killing of commensal *E. faecium*.**

142 Next, we decided to test the role of hGIIA (14 kDa), which catalytic function is  
143 calcium-dependent (27). hGIIA belongs to the secreted PLA2 family of enzymes  
144 present in various genomes, from humans to snakes, invertebrates, plants, fungi and  
145 even bacteria that hydrolyze membrane phospholipids at the *sn-2* position (28).  
146 Although immune cell derived hGIIA was previously identified as a bactericidal  
147 component against several Gram-positive bacteria(29), hGIIA concentrations in  
148 normal serum are much lower than the reported bactericidal concentrations for most  
149 Gram-positive bacteria (30-33). In our pooled human serum, we observed a  
150 concentration of hGIIA of 5 ng/ml (0.3 nM), similar to those described previously

151 (31, 34) (S2 Fig). Nevertheless, we tested whether a specific hGIIA inhibitor  
152 (LY311727, Sigma-Aldrich) could block killing of commensal *E. faecium* in human  
153 serum. We observed that the inhibitor blocks the killing activity in a dose dependent  
154 manner (Fig 3A) and at different concentrations of human serum (Fig 3B). Moreover,  
155 the hGIIA inhibitor blocked killing of all tested commensal *E. faecium* strains (Fig  
156 3C). Complementary, we could restore killing of commensal *E. faecium* in heat-  
157 inactivated serum by reconstituting serum with pure recombinant human hGIIA (Fig  
158 3D). In summary, we found that hGIIA is the key player in killing of commensal *E.*  
159 *faecium* strains by normal human serum.

160

#### 161 **Serum hGIIA causes membrane destabilization in commensal *E. faecium***

162 Finally, we studied how hGIIA in serum causes bacterial killing. hGIIA acts by  
163 hydrolyzing membrane phospholipids in bacterial membranes, whereas host cells are  
164 highly resistant to its activity at normal physiological concentrations (30). Here, we  
165 used a flow cytometric approach to study whether hGIIA can induce membrane  
166 damage to commensal *E. faecium* strains. Bacteria were incubated with human serum  
167 in the presence of the DNA dye (sytox green) that only binds DNA and RNA when  
168 bacterial membranes are damaged (35). While untreated *E. faecium* cells remain sytox  
169 negative, 90% in average of the commensal *E. faecium* population became sytox  
170 positive after 30 min incubation with serum concentrations equal or above 10% (Fig  
171 4B). No increase in sytox intensity was observed in the clinical strain E1162 (Fig 4A-  
172 B). Flow cytometric quantification of sytox influx showed a concentration-dependent  
173 effect of serum at inducing membrane damage of commensal, but not clinical *E.*  
174 *faecium* strains (Fig 4B). Confocal microscopy confirmed membrane damage of the  
175 commensal *E. faecium* E1007 strain but not clinical E1162 strain by human serum

176 (Fig 4C) with different DNA dyes (syto9 and propidium iodide). Furthermore, we  
177 found that the serum-induced membrane permeabilization of the E1007 strain was  
178 mediated by hGIIA, since EDTA and hGIIA inhibition blocked the observed sytox  
179 influx (Fig 4D). Finally, we found that all tested commensal, but not clinical *E.*  
180 *faecium* isolates are sensitive to membrane permeabilization via hGIIA in human  
181 serum (Fig 4E).

182 Altogether we conclude that hGIIA is the principal component of human serum,  
183 which effectively kills commensal *E. faecium* at low concentrations (in the  
184 subnanomolar nM range) by destabilization of the bacterial membrane.

185

## 186 **Discussion**

187 Novel anti-infective strategies are pivotal to curtail the emergence of multidrug-  
188 resistant pathogens. Besides development of direct antibacterial compounds, drugs  
189 acting at the level of interaction between microbes and the immune system could be  
190 promising. Previous studies revealed that *E. faecium* can adopt distinct lifestyles  
191 (commensal and pathogenic), which are represented by two distinct genomic clades  
192 that differ in genetic polymorphisms and gene repertoire (9, 10). Here we identify that  
193 these two clades display distinct susceptibility to killing by normal human serum.  
194 Given the genetic variances in genes that are conserved in commensal and clinical  
195 strains as well as the differences in gene repertoire between clinical and commensal  
196 *E. faecium* strains, it is likely that gene expression and/or differences in gene content  
197 (a result of gene gain and loss) explain this difference in hGIIA resistance between  
198 commensal and clinical strains. Further investigation is needed to identify the  
199 bacterial factors that contribute to *E. faecium* resistance or susceptibility to serum, but  
200 genes related to changes in bacterial surface charge and involved in lipid synthesis in



201 bacteria (36, 37) would be good candidates to be investigated, since hGIIA binding is  
202 directly influence by the negative charge of the bacterial surface and phospholipids  
203 modifications (30). We hypothesize that the development of human serum resistance  
204 may have contributed to the decisive step for *E. faecium* to evolve into a relevant  
205 pathogen. On the other hand, the ability of hGIIA to kill commensal Gram-positives  
206 can be an evolutionary strategy of the innate immune system to contain commensal  
207 bacteria in their specific niches and preclude invasion of sterile tissues.

208 Our study also highlights an important role for hGIIA in the humoral immune  
209 response against *E. faecium*. While other groups reported that high concentrations of  
210 hGIIA (produced locally in lungs and tears (38, 39) or in serum under septic shock  
211 conditions) (40, 41) could disrupt certain Gram-positive bacteria, its importance in  
212 normal serum or plasma has not been recognized in physiological concentrations,  
213 besides against *Listeria monocytogenes* (34). We observed restoration of killing of  
214 commensal *E. faecium* when recombinant hGIIA was added in physiological  
215 concentrations in heat-inactivated human serum. Although our data indicate that  
216 hGIIA is the major factor in serum responsible for the killing phenotype observed  
217 against commensal *E. faecium* strains, further studies are necessary to identify the  
218 specific conditions in serum that facilitate hGIIA action.

219 hGIIA is known for its ability to hydrolyze bacterial membrane phospholipids, which  
220 is a major structural component of the bacterial cell wall (27). Its relevance during  
221 infections stems from *in vivo* studies, in which mice overexpressing human hGIIA  
222 better control infections by group B Streptococcus, *Staphylococcus aureus* and  
223 *Bacillus anthracis* than their control littermates (41-44). Furthermore, the fact that  
224 pathogenic Gram-positive bacteria developed resistance against hGIIA is an  
225 indication for its relevance *in vivo* (44). Future work is needed to unravel whether

226 serum sensitivity to hGIIA mediated killing is specific for commensal *E. faecium*  
227 strains or whether other non-pathogenic Gram-positives may be killed by normal  
228 human serum as well. Thus far, non-pathogenic Gram-positives appear resistant to  
229 serum killing (21). Only *B. anthracis* was previously shown to be sensitive to normal  
230 serum, however this was fully dependent on growth inhibition by transferrin-mediated  
231 iron deprivation (45). hGIIA is an acute phase reactant protein, whose serum  
232 concentration upon bacterial infection can increase up to hundred fold, which is high  
233 enough to kill some Gram-positive pathogens (31). Since hGIIA is able to kill  
234 commensal variants of a clinically relevant multi-resistant pathogen, and since hGIIA  
235 resistance can be an important mechanism of bacterial escape, strategies based on the  
236 use of components of the innate immune system such as hGIIA and even variants of  
237 this latter may be developed to fight against multidrug-resistant bacteria. In  
238 conclusion, the findings presented here not only provide fundamental knowledge  
239 about how the innate immune system kills bacterial cells, it also opens up new  
240 therapeutic routes to boost immune clearance of bacteria through conversion of serum  
241 resistance.

242

## 243 **Materials and Methods**

### 244 **Bacterial strains and growth conditions**

245 The 19 *E. faecium* strains used in this study are from our laboratory collection  
246 (department of medical microbiology, UMC Utrecht) and were previously  
247 characterized bacteria isolated from healthy and hospitalized humans or animals  
248 (Table 1) (9, 46). *E. faecium* was grown at 37°C for 24 hours in Trypticase soy agar II  
249 (TSA) plates supplemented with 5% sheep blood (BD Biosciences) and tryptic soy  
250 broth media (TSB; Oxoid) when indicated.

251

## 252 **Serum, plasma and inhibitors**

253 Normal human serum (HS) was generated at the department of medical microbiology,  
254 UMC Utrecht. As previously described (21), whole blood was drawn via venous  
255 puncture from 20 healthy volunteers who provided written informed consent in  
256 accordance with the Declaration of Helsinki and approval was obtained from the  
257 medical ethics committee of the UMC Utrecht. Following collection via venous  
258 puncture, blood was clotted for 15 min at room temperature. Blood was centrifuged  
259 (10 min at  $2700 \times g$  at  $4^{\circ}\text{C}$ ) and serum (supernatant) was collected, pooled and frozen  
260 in small aliquots before storage at  $-80^{\circ}\text{C}$ . Heat-inactivated (HI) serum was prepared  
261 by incubating serum at  $56^{\circ}\text{C}$  for 30 min. When indicated, EDTA (10 mM), C3  
262 inhibitor compstatin (CP40) (24) (10  $\mu\text{g}/\text{ml}$ ), C5 inhibitor OmCI (25) (10  $\mu\text{g}/\text{ml}$ ),  
263 group IIA secreted phospholipase A2 (hGIIA) inhibitor LY311727 (50  $\mu\text{M}$ ; Sigma-  
264 Aldrich Ltd.) were used. Pure recombinant hGIIA was prepared in *E. coli* as  
265 described (44, 47). hGIIA concentration in human serum was quantified using the  
266 human sPLA2-IIA enzyme linked immunosorbent assay (ELISA) kit from Cayman  
267 Chemicals (Ann Arbor, MI).

268

## 269 **Serum bactericidal assays**

270 *E. faecium* strains were grown in 4 ml TSB to optical density 660 (OD660) 0.4 from  
271 an overnight culture in TSA plates supplemented with 5% sheep blood (BD  
272 Biosciences). Bacteria were centrifuged and resuspended in sterile RPMI (Gibco). For  
273 each specific condition,  $10^5$  bacteria were incubated with human serum (at the  
274 indicated concentrations, with or without inhibitors) in sterile round-bottom 96-wells  
275 plates (Greiner) under shaking conditions for 30 min at  $37^{\circ}\text{C}$ . Killing was evaluated

276 by serial dilution of samples in RPMI and subsequent plating onto TSA plates  
277 supplemented with 5% sheep blood. Following overnight incubation at 37°C,  
278 surviving bacteria were quantified by counting the number of colony forming units  
279 (CFU). Killing was measured by comparison of total colony forming units after 30  
280 min incubation in the control (RPMI) in relation to 25% human serum or other  
281 described condition. Bactericidal assays were performed at least in duplicate per  
282 condition.

283

#### 284 **Bacterial membrane permeabilization**

285 Bacterial membrane permeability was analyzed by flow cytometry and confocal  
286 microscopy. Following incubation of *E. faecium* with serum, the membrane  
287 impermeable nuclei acid dye sytox green (Life technology, 1:5000 (v:v)) was added  
288 to the samples. Sytox green staining was quantified by flow cytometry on a BD  
289 FACSVerse (Becton Dickinson, San Jose, CA, USA, 488 nm laser). Bacteria were  
290 gated based on forward and side scatter properties and fluorescence of 10.000  
291 bacterial cells was quantified. Results were analyzed with FlowJo (version v10).  
292 Based on the buffer negative control condition (RPMI), a threshold was set to  
293 determine the increase of sytox green signal in the population. The increase of sytox  
294 signal was represented as the percentage of the total population that was stained with  
295 sytox green (see results Fig 4A for example of flow cytometry plots). For confocal  
296 microscopy, bacteria were incubated with 25% serum as described above in the  
297 presence of syto9 (1.5 µl) and propidium iodide (1.5 µl) (both from BacLight bacteria  
298 viability kit, Life Technologies). After 10 min incubation at room temperature,  
299 bacteria were mounted in a glass slide with ProLong antifade mountant (Life  
300 Technologies), followed by fluorescence analysis in the confocal microscope (Leica

301 SP5). Syto9 and propidium iodide were excited at 488 nm. Pictures were taken at 40x  
302 magnification and optical zoom of 3x.

303

### 304 **Surface deposition of activated complement products**

305 Deposition of C3b molecules or C5b-9 complexes on *E. faecium* surface was  
306 quantified by flow cytometry as previously described (21). *E. faecium* was incubated  
307 with human serum (or plasma, with or without inhibitors) for 30 min at 37°C, shaking.  
308 After washing, bacteria were incubated with FITC-conjugated anti-C3 antibody  
309 (1 µg/ml, Protos Immunoresearch) or mouse anti-C5b-9 antibody (1 µg/ml, aE11  
310 Santa Cruz) in PBS-1% BSA for 30 min at 4°C. For C5b-9 detection, a subsequent  
311 incubation with FITC-conjugated goat anti-mouse IgG antibody (1 µg/ml, Dako) was  
312 performed (30 min at 4°C). Bacteria were washed once more and fluorescence of  
313 10.000-gated bacteria was quantified by flow cytometry using a FACSVerse flow  
314 cytometer (Becton Dickinson, San Jose, CA, USA) (48).

315

### 316 **Acknowledgements**

317 We would like to thank Prof. Susan Lea from University of Oxford for kindly provide  
318 OmCI and Prof. John Lambris, University of Pennsylvania, Philadelphia for kindly  
319 providing Compstatin (CP40).

320

### 321 **References**

- 322 1. **Doorduyn DJ, Rooijackers SH, van Schaik W, Bardoel BW.** 2016. Complement resistance  
323 mechanisms of *Klebsiella pneumoniae*. *Immunobiology* **221**:1102-1109.  
324 2. **Beutler B.** 2004. Innate immunity: an overview. *Mol Immunol* **40**:845-859.  
325 3. **Brogden KA.** 2005. Antimicrobial peptides: pore formers or metabolic inhibitors in bacteria?  
326 *Nat Rev Microbiol* **3**:238-250.  
327 4. **Brown EJ.** 1985. Interaction of gram-positive microorganisms with complement. *Curr Top*  
328 *Microbiol Immunol* **121**:159-187.  
329 5. **Mundt JO.** 1963. Occurrence of *enterococci* in animals in a wild environment. *Appl*  
330 *Microbiol* **11**:136-140.

- 331 6. **Martin JD, Mundt JO.** 1972. *Enterococci* in insects. *Appl Microbiol* **24**:575-580.
- 332 7. **O'Driscoll T, Crank CW.** 2015. Vancomycin-resistant enterococcal infections:  
333 epidemiology, clinical manifestations, and optimal management. *Infect Drug Resist* **8**:217-  
334 230.
- 335 8. **Guzman Prieto AM, van Schaik W, Rogers MR, Coque TM, Baquero F, Corander J,**  
336 **Willems RJ.** 2016. Global Emergence and Dissemination of *Enterococci* as Nosocomial  
337 Pathogens: Attack of the Clones? *Front Microbiol* **7**:788.
- 338 9. **Lebreton F, van Schaik W, McGuire AM, Godfrey P, Griggs A, Mazumdar V, Corander**  
339 **J, Cheng L, Saif S, Young S, Zeng Q, Wortman J, Birren B, Willems RJ, Earl AM,**  
340 **Gilmore MS.** 2013. Emergence of epidemic multidrug-resistant *Enterococcus faecium* from  
341 animal and commensal strains. *MBio* **4**.
- 342 10. **Willems RJ, Top J, van Schaik W, Leavis H, Bonten M, Siren J, Hanage WP, Corander**  
343 **J.** 2012. Restricted gene flow among hospital subpopulations of *Enterococcus faecium*. *MBio*  
344 **3**:e00151-00112.
- 345 11. **Zhang X, Top J, de Been M, Bierschenk D, Rogers M, Leendertse M, Bonten MJ, van**  
346 **der Poll T, Willems RJ, van Schaik W.** 2013. Identification of a genetic determinant in  
347 clinical *Enterococcus faecium* strains that contributes to intestinal colonization during  
348 antibiotic treatment. *J Infect Dis* **207**:1780-1786.
- 349 12. **Paganelli FL, Huebner J, Singh KV, Zhang X, van Schaik W, Wobser D, Braat JC,**  
350 **Murray BE, Bonten MJ, Willems RJ, Leavis HL.** 2016. Genome-wide Screening Identifies  
351 Phosphotransferase System Permease BepA to Be Involved in *Enterococcus faecium*  
352 Endocarditis and Biofilm Formation. *J Infect Dis* **214**:189-195.
- 353 13. **Vaishnav S, Yamamoto M, Severson KM, Ruhn KA, Yu X, Koren O, Ley R, Wakeland**  
354 **EK, Hooper LV.** 2011. The antibacterial lectin RegIIIgamma promotes the spatial  
355 segregation of microbiota and host in the intestine. *Science* **334**:255-258.
- 356 14. **Leendertse M, Willems RJ, Oei GA, Florquin S, Bonten MJ, van der Poll T.** 2009.  
357 Intestinal *Enterococcus faecium* colonization improves host defense during polymicrobial  
358 peritonitis. *J Infect Dis* **200**:735-744.
- 359 15. **Leendertse M, Willems RJ, Giebelen IA, Roelofs JJ, Bonten MJ, van der Poll T.** 2009.  
360 Neutrophils are essential for rapid clearance of *Enterococcus faecium* in mice. *Infect Immun*  
361 **77**:485-491.
- 362 16. **Leendertse M, Willems RJ, Giebelen IA, Roelofs JJ, van Rooijen N, Bonten MJ, van der**  
363 **Poll T.** 2009. Peritoneal macrophages are important for the early containment of *Enterococcus*  
364 *faecium* peritonitis in mice. *Innate Immun* **15**:3-12.
- 365 17. **Leendertse M, Willems RJ, Giebelen IA, van den Pangaart PS, Wiersinga WJ, de Vos**  
366 **AF, Florquin S, Bonten MJ, van der Poll T.** 2008. TLR2-dependent MyD88 signaling  
367 contributes to early host defense in murine *Enterococcus faecium* peritonitis. *J Immunol*  
368 **180**:4865-4874.
- 369 18. **Zou J, Shankar N.** 2016. Surface protein Esp enhances pro-inflammatory cytokine  
370 expression through NF-kappaB activation during enterococcal infection. *Innate Immun* **22**:31-  
371 39.
- 372 19. **Bloes DA, Otto M, Peschel A, Kretschmer D.** 2012. *Enterococcus faecium* stimulates  
373 human neutrophils via the formyl-peptide receptor 2. *PLoS One* **7**:e39910.
- 374 20. **Berends ET, Mohan S, Miellel WR, Ruyken M, Rooijackers SH.** 2015. Contribution of  
375 the complement Membrane Attack Complex to the bactericidal activity of human serum. *Mol*  
376 *Immunol* **65**:328-335.
- 377 21. **Berends ET, Dekkers JF, Nijland R, Kuipers A, Soppe JA, van Strijp JA, Rooijackers**  
378 **SH.** 2013. Distinct localization of the complement C5b-9 complex on Gram-positive bacteria.  
379 *Cell Microbiol* **15**:1955-1968.
- 380 22. **Joisel F, Leroux-Nicollet I, Lebreton JP, Fontaine M.** 1983. A hemolytic assay for clinical  
381 investigation of human C2. *J Immunol Methods* **59**:229-235.
- 382 23. **Muller-Eberhard HJ.** 1969. Complement. *Annu Rev Biochem* **38**:389-414.
- 383 24. **Sahu A, Kay BK, Lambris JD.** 1996. Inhibition of human complement by a C3-binding  
384 peptide isolated from a phage-displayed random peptide library. *J Immunol* **157**:884-891.
- 385 25. **Nunn MA, Sharma A, Paesen GC, Adamson S, Lissina O, Willis AC, Nuttall PA.** 2005.  
386 Complement inhibitor of C5 activation from the soft tick *Ornithodoros moubata*. *J Immunol*  
387 **174**:2084-2091.
- 388 26. **Nevalainen TJ, Cardoso JC, Riikonen PT.** 2012. Conserved domains and evolution of  
389 secreted phospholipases A(2). *FEBS J* **279**:636-649.
- 390 27. **van den Bosch H.** 1980. Intracellular phospholipases A. *Biochim Biophys Acta* **604**:191-246.

- 391 28. **Lambeau G, Gelb MH.** 2008. Biochemistry and physiology of mammalian secreted  
392 phospholipases A2. *Annu Rev Biochem* **77**:495-520.
- 393 29. **Foreman-Wykert AK, Weinrauch Y, Elsbach P, Weiss J.** 1999. Cell-wall determinants of  
394 the bactericidal action of group IIA phospholipase A2 against Gram-positive bacteria. *J Clin*  
395 *Invest* **103**:715-721.
- 396 30. **Weiss JP.** 2015. Molecular determinants of bacterial sensitivity and resistance to mammalian  
397 Group IIA phospholipase A2. *Biochim Biophys Acta* **1848**:3072-3077.
- 398 31. **Nevalainen TJ, Eerola LI, Rintala E, Laine VJ, Lambeau G, Gelb MH.** 2005. Time-  
399 resolved fluoroimmunoassays of the complete set of secreted phospholipases A2 in human  
400 serum. *Biochim Biophys Acta* **1733**:210-223.
- 401 32. **Nevalainen TJ, Graham GG, Scott KF.** 2008. Antibacterial actions of secreted  
402 phospholipases A2. Review. *Biochim Biophys Acta* **1781**:1-9.
- 403 33. **Wu Y, Raymond B, Goossens PL, Njamkepo E, Guiso N, Paya M, Touqui L.** 2010. Type-  
404 IIA secreted phospholipase A2 is an endogenous antibiotic-like protein of the host. *Biochimie*  
405 **92**:583-587.
- 406 34. **Gronroos JO, Laine VJ, Nevalainen TJ.** 2002. Bactericidal group IIA phospholipase A2 in  
407 serum of patients with bacterial infections. *J Infect Dis* **185**:1767-1772.
- 408 35. **Lebaron P, Catala P, Parthuisot N.** 1998. Effectiveness of SYTOX Green stain for bacterial  
409 viability assessment. *Appl Environ Microbiol* **64**:2697-2700.
- 410 36. **Lin Y, Bogdanov M, Lu S, Guan Z, Margolin W, Weiss JP, Zheng L.** 2018. The  
411 phospholipid-repair system LplT/Aas in Gram-negative bacteria protects the bacterial  
412 membrane envelope from host phospholipase A2 attack. *J Biol Chem*  
413 doi:10.1074/jbc.RA117.001231.
- 414 37. **Arduino RC, Jacques-Palaz K, Murray BE, Rakita RM.** 1994. Resistance of *Enterococcus*  
415 *faecium* to neutrophil-mediated phagocytosis. *Infect Immun* **62**:5587-5594.
- 416 38. **Qu XD, Lehrer RI.** 1998. Secretory phospholipase A2 is the principal bactericide for  
417 *staphylococci* and other gram-positive bacteria in human tears. *Infect Immun* **66**:2791-2797.
- 418 39. **Saari KM, Aho V, Paavilainen V, Nevalainen TJ.** 2001. Group II PLA(2) content of tears in  
419 normal subjects. *Invest Ophthalmol Vis Sci* **42**:318-320.
- 420 40. **Pernet E, Brunet J, Guillemot L, Chignard M, Touqui L, Wu Y.** 2015. *Staphylococcus*  
421 *aureus* Adenosine Inhibits sPLA2-IIA-Mediated Host Killing in the Airways. *J Immunol*  
422 **194**:5312-5319.
- 423 41. **Pernet E, Guillemot L, Burgel PR, Martin C, Lambeau G, Sermet-Gaudelus I, Sands D,**  
424 **Leduc D, Morand PC, Jeammet L, Chignard M, Wu Y, Touqui L.** 2014. *Pseudomonas*  
425 *aeruginosa* eradicates *Staphylococcus aureus* by manipulating the host immunity. *Nat*  
426 *Commun* **5**:5105.
- 427 42. **Piris-Gimenez A, Paya M, Lambeau G, Chignard M, Mock M, Touqui L, Goossens PL.**  
428 2005. In vivo protective role of human group IIA phospholipase A2 against experimental  
429 anthrax. *J Immunol* **175**:6786-6791.
- 430 43. **Movert E, Wu Y, Lambeau G, Touqui L, Areschoug T.** 2011. A novel bacterial resistance  
431 mechanism against human group IIA-secreted phospholipase A2: role of *Streptococcus*  
432 *pyogenes* sortase A. *J Immunol* **187**:6437-6446.
- 433 44. **Movert E, Wu Y, Lambeau G, Kahn F, Touqui L, Areschoug T.** 2013. Secreted group IIA  
434 phospholipase A2 protects humans against the group B *streptococcus*: experimental and  
435 clinical evidence. *J Infect Dis* **208**:2025-2035.
- 436 45. **Rooijackers SH, Rasmussen SL, McGillivray SM, Bartnikas TB, Mason AB,**  
437 **Friedlander AM, Nizet V.** 2010. Human transferrin confers serum resistance against *Bacillus*  
438 *anthracis*. *J Biol Chem* **285**:27609-27613.
- 439 46. **Paganelli FL, de Been M, Braat JC, Hoogenboezem T, Vink C, Bayjanov J, Rogers MR,**  
440 **Huebner J, Bonten MJ, Willems RJ, Leavis HL.** 2015. Distinct SagA from Hospital-  
441 Associated Clade A1 *Enterococcus faecium* Strains Contributes to Biofilm Formation. *Appl*  
442 *Environ Microbiol* **81**:6873-6882.
- 443 47. **Ghomashchi F, Brglez V, Payre C, Jeammet L, Bezzine S, Gelb MH, Lambeau G.** 2017.  
444 Preparation of the Full Set of Recombinant Mouse- and Human-Secreted Phospholipases A2.  
445 *Methods Enzymol* **583**:35-69.
- 446 48. **Berends ET, Gorham RD, Jr., Ruyken M, Soppe JA, Orhan H, Aerts PC, de Haas CJ,**  
447 **Gros P, Rooijackers SH.** 2015. Molecular insights into the surface-specific arrangement of  
448 complement C5 convertase enzymes. *BMC Biol* **13**:93.
- 449 49. **Zhang X, de Maat V, Guzman Prieto AM, Prajsnar TK, Bayjanov JR, de Been M,**  
450 **Rogers MRC, Bonten MJM, Mesnage S, Willems RJL, van Schaik W.** 2017. RNA-seq

451 and Tn-seq reveal fitness determinants of vancomycin-resistant *Enterococcus faecium* during  
 452 growth in human serum. BMC Genomics **18**:893.  
 453 50. van Schaik W, Top J, Riley DR, Boekhorst J, Vrijenhoek JE, Schapendonk CM,  
 454 Hendrickx AP, Nijman IJ, Bonten MJ, Tettelin H, Willems RJ. 2010. Pyrosequencing-  
 455 based comparative genome analysis of the nosocomial pathogen *Enterococcus faecium* and  
 456 identification of a large transferable pathogenicity island. BMC Genomics **11**:239.  
 457

## 458 Tables

459 **Table 1.** Ecological origin and clade assignment of 19 *E. faecium* strains.

| Strains | Other name | Clade <sup>1</sup> | Country <sup>2</sup> | Year | Source               | Isolation site | Reference |
|---------|------------|--------------------|----------------------|------|----------------------|----------------|-----------|
| E0333   | EnGen0013  | A1                 | ISR                  | 1997 | Hospitalized patient | Blood          | (9)       |
| E0745   | E0745      | A1                 | NL                   | 2000 | Hospitalized patient | Feces          | (49)      |
| E1162   | E1162      | A1                 | FR                   | 1997 | Hospitalized patient | Blood          | (50)      |
| E1321   | EnGen0054  | A1                 | IT                   | 1999 | Hospitalized patient | Catheter       | (9)       |
| E1392   | EnGen0016  | A1                 | GBR                  | 2000 | Hospitalized patient | nd             | (9)       |
| E1644   | EnGen0051  | A1                 | GER                  | 2002 | Hospitalized patient | nd             | (9)       |
| E1731   | EnGen0036  | A1                 | TZA                  | 2002 | Hospitalized patient | Blood          | (9)       |
| E2297   | EnGen0034  | A1                 | USA                  | 2001 | Hospitalized patient | Urine          | (9)       |
| E2560   | EnGen0046  | A1                 | NL                   | 2006 | Hospitalized patient | Blood          | (9)       |
| E0045   | EnGen0005  | IG                 | GBR                  | 1992 | Health Poultry       | Feces          | (9)       |
| E0164   | EnGen0010  | IG                 | NL                   | 1996 | Health Poultry       | Feces          | (9)       |
| E1573   | EnGen0009  | A1                 | BE                   | 1994 | Health Bison         | Rumen          | (9)       |
| E1604   | EnGen0028  | B                  | NO                   | 1956 | Cheese               | -              | (9)       |
| E2134   | EnGen0043  | IG                 | NL                   | 2004 | Health Poultry       | nd             | (9)       |
| E4215   | EnGen0048  | IG                 | SWE                  | 2004 | Health Poultry       | nd             | (9)       |
| E1007   | EnGen0015  | B                  | NL                   | 1998 | Health Human         | Feces          | (9)       |
| E1050   | EnGen0017  | A1                 | NL                   | 1998 | Health Human         | Feces          | (9)       |
| E1590   | EnGen0003  | B                  | IRL                  | 2001 | Health Human         | Feces          | (9)       |
| E3548   | EnGen0047  | B                  | NL                   | 2004 | Health Human         | Blood          | (9)       |

460 <sup>1</sup>Clade structure was based on the classification described by Paganelli *et al.* (46)

461 <sup>2</sup>Contries: NL: Netherlands; ISR: Israel; FR: France; IT: Italy; GBR: Great Britain;

462 GER: Germany; TZA: Tanzania; USA: United States; BE: Belgium; NOR: Norway;



463 SWE: Sweden; IRL: Ireland.

464

## 465 **Figure Captions**

### 466 **Figure 1. Human serum kills commensal, but not clinical *E. faecium* isolates.**

467 (A) Comparison of bacterial survival at different concentrations of pooled normal  
468 human serum of clinical *E. faecium* strain E1162 (clinical) and commensal *E. faecium*  
469 strain E1007 (commensal). (B) Killing of *E. faecium* isolates originating from  
470 hospitalized patients (clinical), healthy animals (commensal animal) and healthy  
471 humans (commensal humans) in 25% pooled human serum. Killing was quantified by  
472 comparison of total colony forming units after 30 min incubation in the buffer  
473 negative control (RPMI) compared to 25% human serum. Epidemiological details of  
474 *E. faecium* strains are listed in table 1.

475

### 476 **Figure 2. Complement does not contribute to serum-mediated killing of** 477 **commensal *E. faecium*.**

478 (A) Killing of commensal *E. faecium* strain E1007 was measured by bacterial  
479 viability on blood agar plates after 30 min incubation at the indicated conditions. (B)  
480 Complement system activity in human serum was measured by C5b-9 deposition on  
481 bacterial surface of clinical isolate E1162.

482

### 483 **Figure 3. hGIIA is essential for serum killing of commensal *E. faecium*.**

484 (A) Killing of commensal *E. faecium* strain E1007 in 25% pooled human serum is  
485 inhibited by hGIIA inhibitor (LY311727) in a dose-dependent manner. (B) Killing of  
486 commensal *E. faecium* strain E1007 in different concentrations of human serum  
487 incubated with or without hGIIA inhibitor (LY311727). (C) Killing of *E. faecium*

488 commensal strains E1050, 1590, E3548 and E1007 in 25% pooled human serum with  
489 or without 50  $\mu$ M of hGIIA inhibitor (LY311727), respectively. (D) Killing of *E.*  
490 *faecium* commensal strains E1050, 1590, E3548 and E1007 in 25% pooled heat-  
491 inactivated (HI) human serum without or with recombinant hGIIA, respectively.  
492 Killing was quantified by bacterial viability on blood agar plates after 30 min  
493 incubation in the different conditions.

494

495 **Figure 4. Serum hGIIA causes membrane permeabilization in commensal *E.***  
496 ***faecium*.**

497 (A) Representative flow cytometry plots of sytox green influx (switch to the right) of  
498 commensal *E. faecium* isolate E1007 incubated with RPMI (buffer) and clinical  
499 (E1162) and commensal (E1007) strains incubated with 25% pooled human serum.  
500 (B) Sytox green influx in E1007 and E1162 using different concentration of human  
501 serum. (C) Confocal pictures of clinical (E1162) and commensal (E1007) *E. faecium*  
502 strains incubated with RPMI (buffer) or 25% human serum in the presence of syto9  
503 (in green) representing live cells and propidium iodide (in red) representing damaged  
504 bacterial membrane. *E. faecium* membrane permeabilization of clinical strain E1162  
505 and commensal strain E1007 was measured by sytox green influx in the described  
506 conditions. (D) Sytox green influx upon incubation in serum in the absence or  
507 presence of hGIIA inhibitors and upon restoration in heat-inactivated (HI) human  
508 serum with recombinant hGIIA. (E) Sytox green influx in *E. faecium* clinical strains  
509 E2560, E0745, E1162 and commensal strains E1050, E1590, E3548, E1007 in RPMI  
510 (buffer), 25% pooled human serum without or with 50  $\mu$ M of hGIIA inhibitor  
511 (LY311727) or heat-inactivated (HI) human serum with 5 ng/ml recombinant hGIIA,  
512 respectively.

513

## 514 **Supplementary Material Captions**

515 **S1 Figure. Complement system activity in human serum.** A. Killing of clinical *E.*  
516 *faecium* strain E1162 was measured by cell viability on blood agar plates after 30 min  
517 incubation on the indicated conditions. B. Inhibition of complement system was  
518 measured by C3b deposition on bacterial surface.

519

520 **S2 Figure. hGIIA concentration in pooled normal human serum.** hGIIA  
521 concentration in pooled normal human serum used in all assay was measured by Elisa  
522 kit (Cayman).

523

Figure 1.

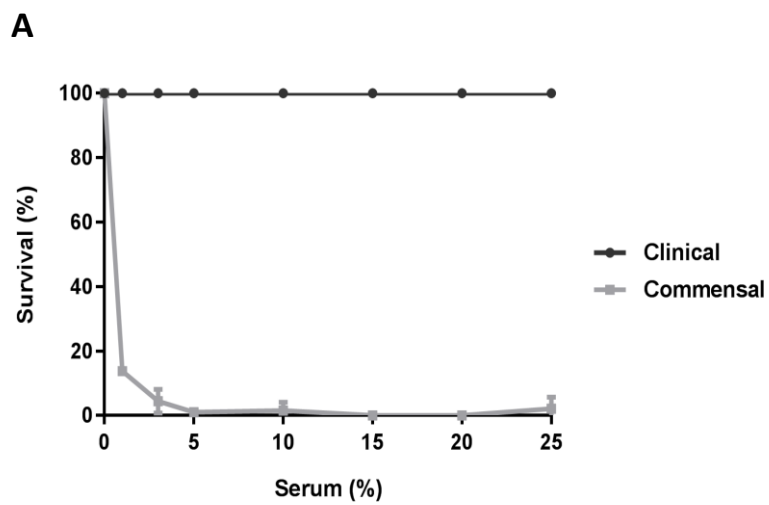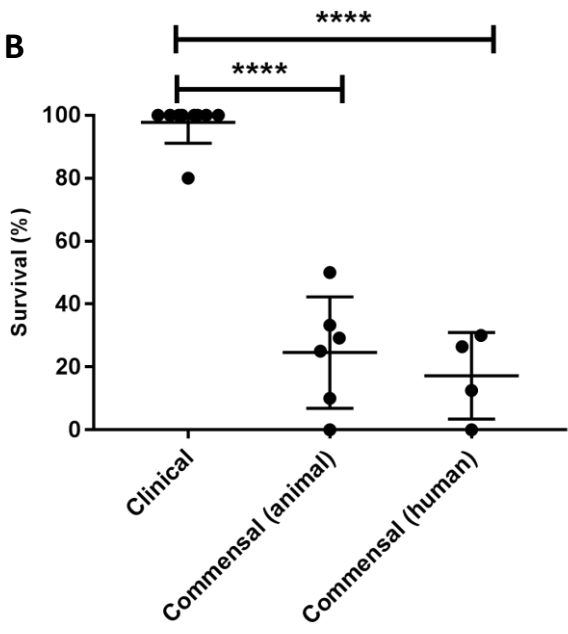

**Figure 2.**

**A**

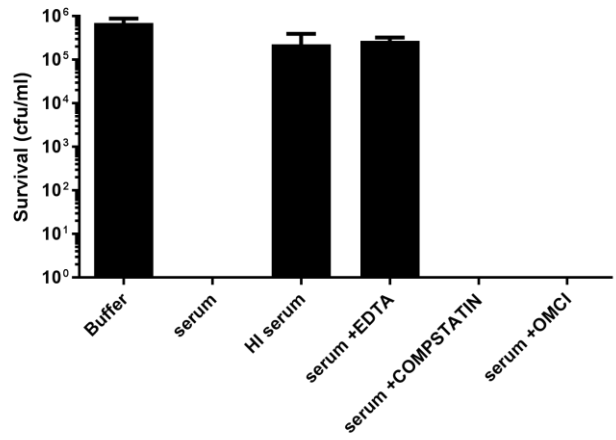

**B**

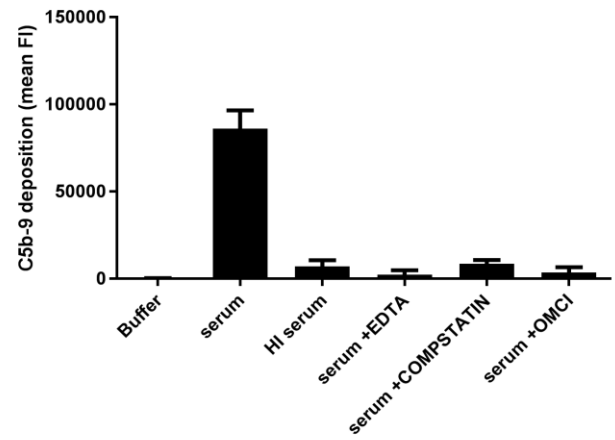

**Figure 3.**

**A**

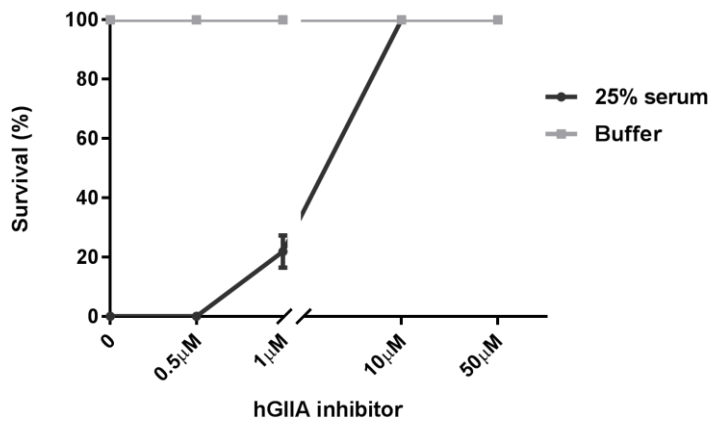

**B**

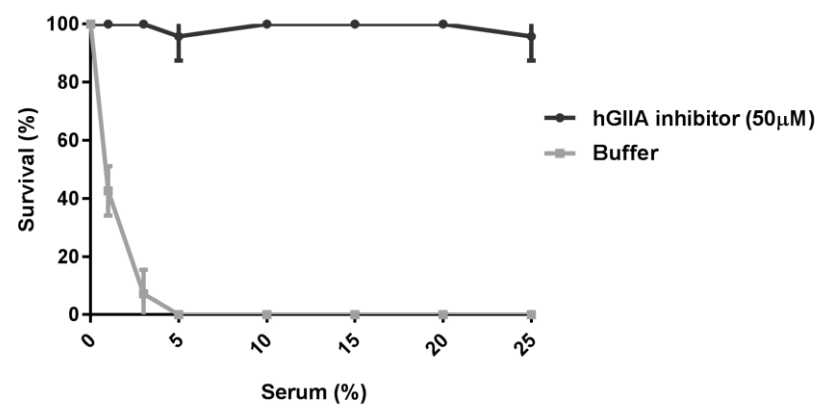

**C**

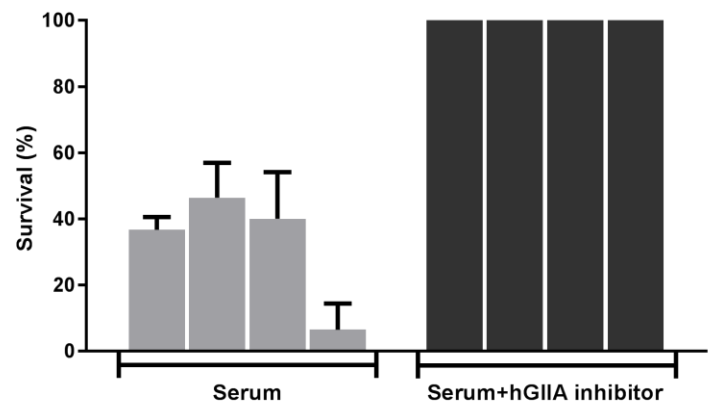

**D**

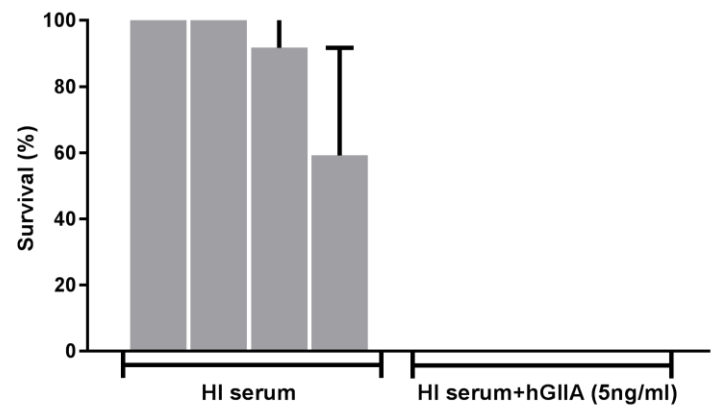

**Figure 4.**

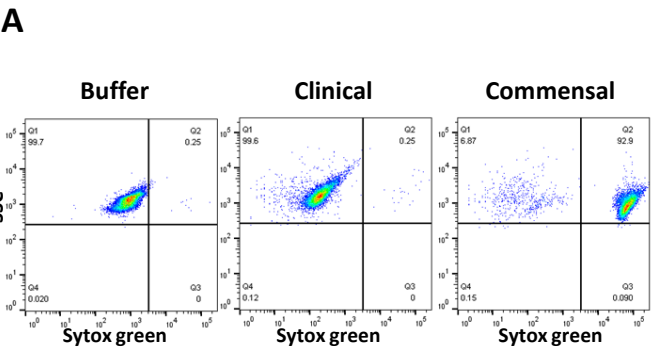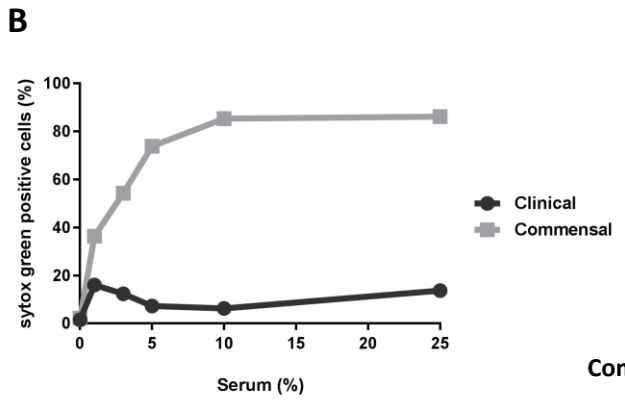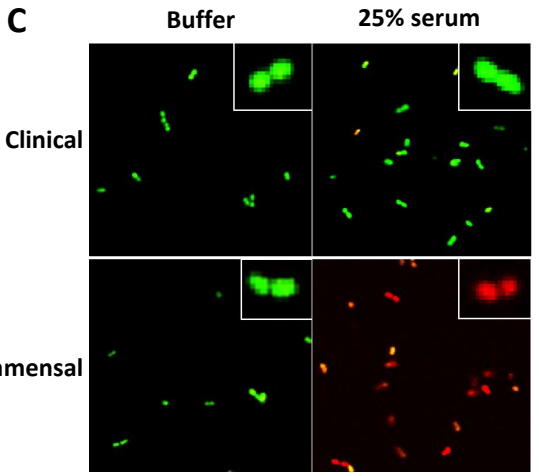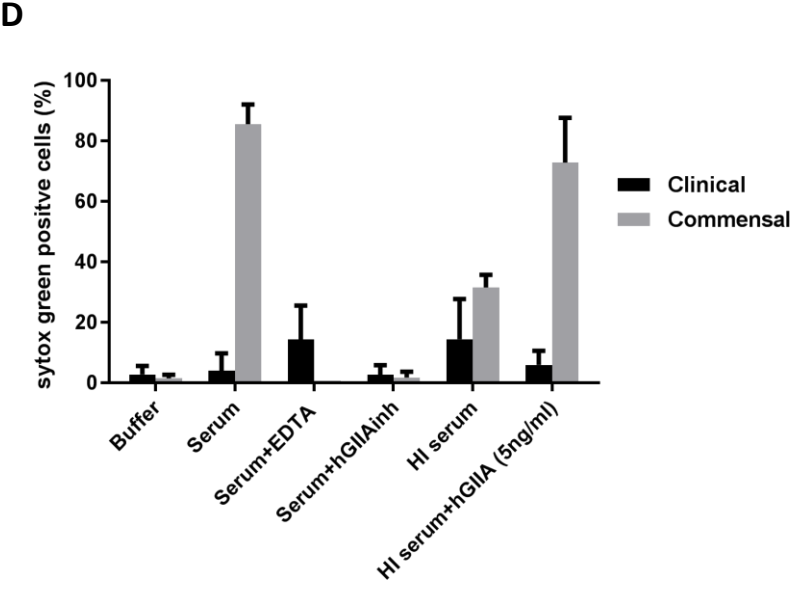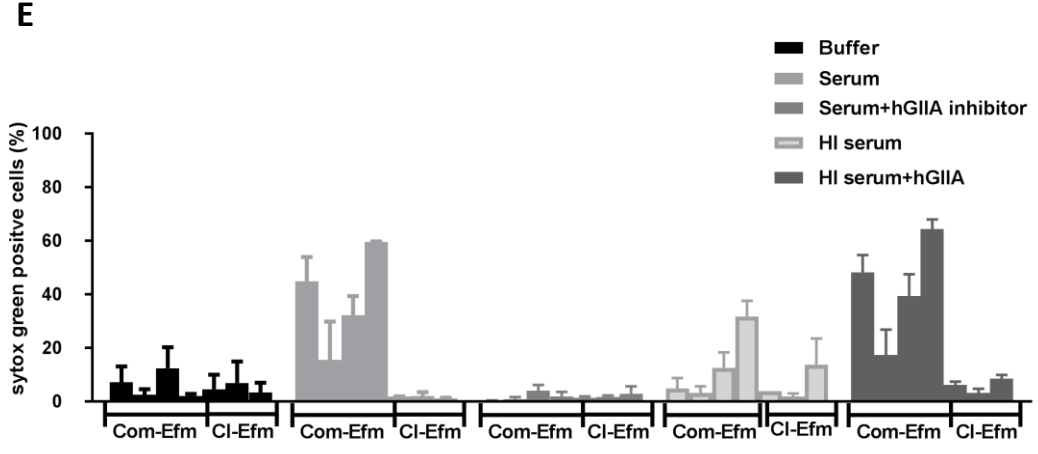

Source: https://www.biorxiv.org/content/10.1101/272617v2.full.pdf
